# Supplementary material for: An adherent drug depot for retinal ganglion cell protection and regeneration in rat traumatic optic neuropathy models
Source: Royal Society of Chemistry journal article supplement (doi:10.1039/d0ra10362d), 2021-01-01
Supplement: d0ra10362d1.pdf [file d0ra10362d1.pdf]

## An adherent Drug Depot for Retinal Ganglion cells Protection and Regeneration in Rat Traumatic Optic Neuropathy Models

### Supporting Information

The corresponding Fitting Formula and R<sup>2</sup> values derived from diameter distribution of Figure 2

1: Fitting formula of diameter distribution in outer layer of DBP

$$y = 0.31449 + \left( \frac{47.09097}{2.66897 \frac{\sqrt{\pi}}{2}} \right) * e^{-2 \left( \frac{X-3.74822}{2.66897} \right)^2}$$

$$R^2=0.88689$$

2: Fitting formula of diameter distribution in inner layer of DBP

$$y = 0.65701 + \left( \frac{42.98117}{3.06808 \frac{\sqrt{\pi}}{2}} \right) * e^{-2 \left( \frac{X-7.09961}{3.06808} \right)^2}$$

$$R^2=0.88369$$

3: Fitting formula of diameter distribution in PLGA-FA

$$y = -0.00608 + \left( \frac{50.13726}{1.71355 \frac{\sqrt{\pi}}{2}} \right) * e^{-2 \left( \frac{X-3.39016}{1.71355} \right)^2}$$

$$R^2=0.99514$$

4: Fitting formula of diameter distribution in PLGA/COL-TA

$$y = 0.58245 + \left( \frac{43.5951}{2.49428 \frac{\sqrt{\pi}}{2}} \right) * e^{-2 \left( \frac{X-6.20238}{2.49428} \right)^2}$$

$$R^2=0.82627$$
